# Supplementary material for: Cholecystectomy increases the risk of metabolic syndrome in the Korean population: a longitudinal cohort study
Source: PubMed Central journal article supplement — Hepatobiliary Surg Nutr. 2022 Dec 6;12(4):523–33. doi: 10.21037/hbsn-22-201 (PMC10432299; doi:10.21037/hbsn-22-201), 2022-12-06
Supplement: hbsn-12-04-523-dss.pdf [file hbsn-12-04-523-dss.pdf]

## Data Sharing Statement

|                     |                                                                                                                                                     |                                                                                                                      |
|---------------------|-----------------------------------------------------------------------------------------------------------------------------------------------------|----------------------------------------------------------------------------------------------------------------------|
| <b>Article Info</b> | <a href="https://dx.doi.org/10.21037/hbsn-22-201">https://dx.doi.org/10.21037/hbsn-22-201</a>                                                       |                                                                                                                      |
| <b>Item</b>         | <b>Question</b>                                                                                                                                     | <b>Authors' Response<br/>(place "-" if not applicable)</b>                                                           |
| 1                   | Would you like to share data collected for your study to others?                                                                                    | Yes                                                                                                                  |
| 2                   | If not, would you like to share the reason for your decision?                                                                                       | -                                                                                                                    |
| 3                   | What data in particular will be shared?                                                                                                             | The metabolic data will be shared.                                                                                   |
| 4                   | Any other documents will be shared? Such as study protocol, statistical analysis plan, informed consent form, clinical study report, analytic code. | Study protocol, statistical analysis plan, clinical study report and analytic code will also be shared if requested. |
| 5                   | When will data availability begin?                                                                                                                  | From the publication date                                                                                            |
| 6                   | When will data availability end?                                                                                                                    | Three years within the publication date.                                                                             |
| 7                   | To whom will you share the data?                                                                                                                    | General surgeons and endocrinologist who are interested in metabolic syndrome after cholecystectomy.                 |
| 8                   | For what type of analysis or purpose?                                                                                                               | For analysis to evaluate the development of metabolic syndrome after cholecystectomy                                 |
| 9                   | How or where can the data/documents be obtained?                                                                                                    | Emails could be sent to the address below to obtain the shared data:<br>kjpg0804@empas.com                           |
| 10                  | Any other restrictions?                                                                                                                             | We may balance the potential benefits and risks for each request and then provide the data that could be shared.     |
