# Supplementary material for: Cholecystectomy increases the risk of metabolic syndrome in the Korean population: a longitudinal cohort study
Source: PubMed Central journal article supplement — Hepatobiliary Surg Nutr. 2022 Dec 6;12(4):523–33. doi: 10.21037/hbsn-22-201 (PMC10432299; doi:10.21037/hbsn-22-201), 2022-12-06
Supplement: hbsn-12-04-523-supplementary.pdf [file hbsn-12-04-523-supplementary.pdf]

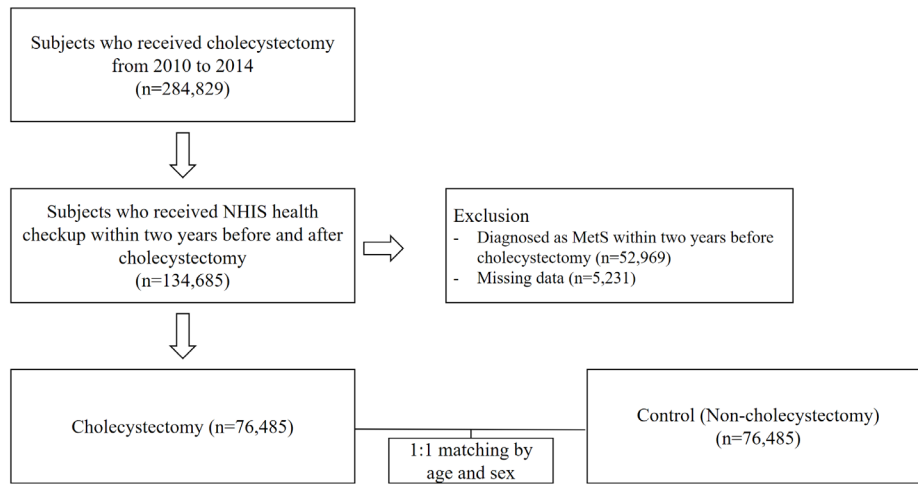

**Figure S1** Flow chart of the selection process.

**Table S1** Risk of metabolic syndrome according to the cholecystectomy status in the PS-matched

| Cholecystectomy status | Odds ratio (95% confidence intervals) |
|------------------------|---------------------------------------|
| Non-cholecystectomy    | 1 (reference)                         |
| Cholecystectomy        | 1.10 (1.04–1.18)                      |

PS, propensity score.
